# Supplementary material
Source: ML conference proceedings conference paper supplement (https://openaccess.thecvf.com/content/ICCV2025/html/An_MinCD-PnP_Learning_2D-3D_ICCV_2025_paper.html)
Supplement: Supplementary file 2 [file An_MinCD-PnP_Learning_2D-3D_ICCV_2025_supplemental.pdf]

# Supplement Materials of MinCD-PnP: Learning 2D-3D Correspondences with Approximate Blind PnP

Pei An<sup>1\*</sup>, Jiaqi Yang<sup>2\*</sup>, Muyao Peng<sup>1</sup>, You Yang<sup>1†</sup>, Qiong Liu<sup>1</sup>, Xiaolin Wu<sup>3</sup>, Liangliang Nan<sup>4</sup>

<sup>1</sup>Huazhong University of Science and Technology, China

<sup>2</sup>Northwestern Polytechnical University, China

<sup>3</sup>Southwest Jiaotong University, China <sup>4</sup>Delft University of Technology, Netherlands

## 1. Implementation details of MinCD-Net

More details of MinCD-Net are discussed here. Its inputs include an RGB image with surface normals and an RGB point cloud with surface normals. Image surface normals are predicted using the pre-trained model DSINE [2]. The extractors are ResNet [5] and KPConv [13], where the extractor networks are similar to those in MATR [8].

The threshold  $s_{th}$  in Eq. (14) is set to  $e^{-0.4}$ . Point transformer is the single layer of work [15]. Its key, query, and value inputs are the 128 dimensional features which are transformed from pixels and points features. To estimate the camera pose, we use two-layer MLPs with dimensions [256, 128] and [128, 6] to predict a  $6 \times 1$  vector representing the  $se(3)$  of  $\mathbf{T}$ , and  $\mathbf{T}$  is computed via the mapping from  $se(3)$  to  $SE(3)$ . We utilize Shi-Tomasi keypoint detection provided by OpenCV API *Good Features to Track* to extract  $\mathbf{K}_l$  that are uniformly distributed in the image. We train MinCD-Net on a single NVIDIA RTX 3080 GPU for 40 epochs. To evaluate the proposed method in the practical applications, we prepare a self-collected dataset. It is captured by an Intel RealSense depth camera. Examples of scenes are provided in Fig. 1.

## 2. Additional comparisons

We evaluate the registration performance of current I2P registration methods on the outdoor KITTI benchmark [4]. DeepI2P [7], Corri2P [10], VP2P-Match [16], CoFiI2P [6], CMR-Agent [14], and OL-Reg [1] are used for comparison. We utilize the pretrained Corri2P to preprocess the LiDAR point clouds to gather the overlapped LiDAR point clouds, as the inputs of MATR+MinCD-Net. Results are shown in Table 1. The average relative translational error (RTE) and average relative rotation error (RRE) are used as metrics. These results indicate that MinCD-Net achieves state-of-the-art performance on the KITTI benchmark.

\*Equal contribution

†Corresponding author: yangyou@hust.edu.cn

Table 1. Comparisons on the KITTI dataset. † indicates the usage of a pretrained model to segment the overlapped point cloud, which falls into the field of view of the camera.

| Methods         | Venue            | RTE/m        | RRE/deg      |
|-----------------|------------------|--------------|--------------|
| DeepI2P         | CVPR 2021        | 1.460        | 4.270        |
| Corri2P         | IEEE T-CSVT 2022 | 0.740        | 2.070        |
| VP2P-match      | NeurIPS 2023     | 0.750        | 3.290        |
| CoFiI2P         | IEEE RAL 2024    | 0.290        | 1.140        |
| CMR-Agent       | IROS 2024        | 0.195        | 0.589        |
| MATR+MinCD-Net† |                  | <b>0.091</b> | <b>0.228</b> |

Table 2. Ablation study of the proposed method with different choices of 2D keypoint detectors.

| Schemes | Shi-Tomasi (used) | FAST  | SIFT  | SuperPoint | Uniformly sampled |
|---------|-------------------|-------|-------|------------|-------------------|
| IR      | 0.567             | 0.552 | 0.572 | 0.560      | 0.542             |
| RR      | 0.646             | 0.631 | 0.638 | 0.649      | 0.625             |

Table 3. Computational efficiency analysis of the current methods. Diff. PnP, BPnPNet, and MinCD-Net are only used to supervise the backbone networks (not used in the inference stage), so the runtime and GPU memory in the training stage are recorded.

| Methods           | Runtime/ms       | Param/M            | GPU memory/MB      | RR           |
|-------------------|------------------|--------------------|--------------------|--------------|
| Baseline          | 127              | 28.2               | 7532               | 51.0%        |
| +Diff. PnP        | 152 (+25)        | 28.2 (+0.0)        | 7852 (+320)        | 49.1%        |
| +BPnPNet          | 141 (+14)        | 30.8 (+2.6)        | 8242 (+710)        | 57.8%        |
| <b>+MinCD-Net</b> | <b>148 (+21)</b> | <b>31.4 (+3.2)</b> | <b>8353 (+821)</b> | <b>64.7%</b> |

Additional qualitative results are shown in Fig. 2. It is found that the proposed MinCD-Net achieves both robust and accurate performance compared to existing differentiable PnP based methods in the cross-scene setting.

## 3. Additional ablation studies

We investigate the dependency of MinCD-Net on 2D keypoint detectors, like FAST [11], SIFT [9], Superpoint [12], and even the uniformly sampled scheme. Results in Table 2 indicate that MinCD-Net achieves nearly the same results as other standard detectors, even with uniform sampling. This indicates that while MinCD-Net requires 2D key-

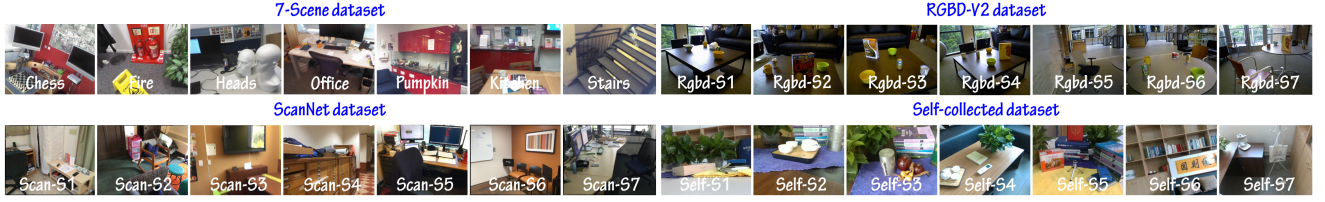

Figure 1. Example scenes from the 7-Scenes, RGBD-V2, ScanNet, and self-collected datasets (referred to as *Rgbd*, *Scan*, and *Self*).

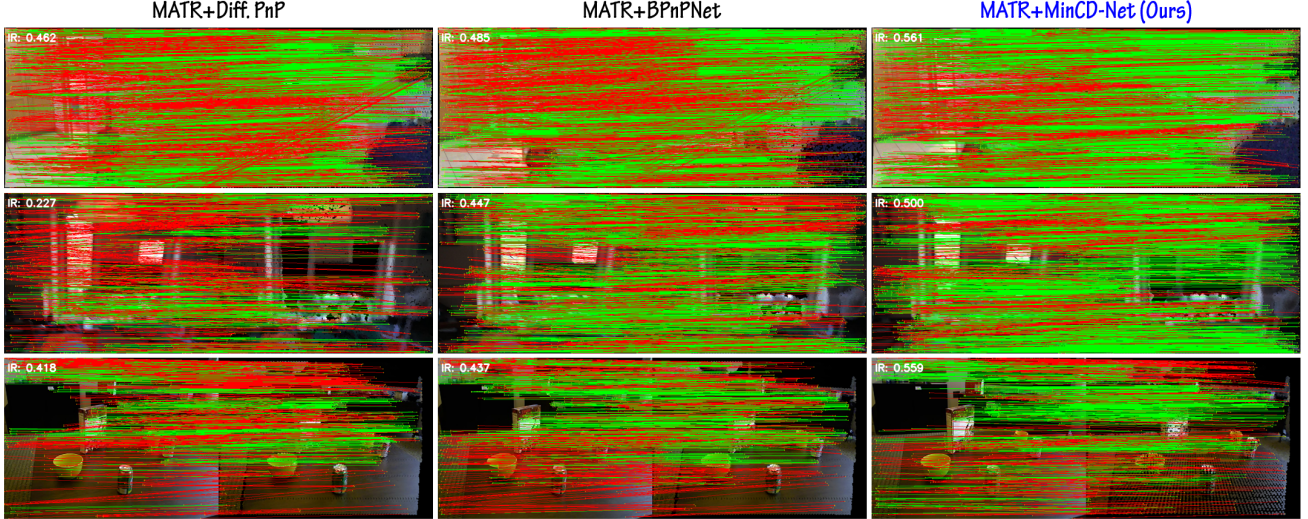

Figure 2. Visualization of different methods. MinCD-Net achieves a higher correspondence accuracy than other methods.

points, it does not depend on a specific detection method. Besides, the computational analysis of the current methods is provided in Table 3. It indicates that MinCD-Net is a lightweight network with comparable runtime and GPU memory. Overall, the above results show the effectiveness of MinCD-Net.

#### 4. Limitations and future work

In the challenging scenarios (e.g., the self-collected dataset), the performance gain of MinCD-Net is limited (as seen in Table 2 in the format conference manuscript). The precision of learned 3D keypoints is not high (as seen in Table 6 in the format conference manuscript). To address these limitations, we plan to integrate a learnable correspondences pruning module [3] to improve the efficiency of solving MinCD-PnP.

#### References

- [1] Pei An, Xuzhong Hu, Junfeng Ding, Jun Zhang, Jie Ma, You Yang, and Qiong Liu. Ol-reg: Registration of image and sparse lidar point cloud with object-level dense correspondences. *IEEE Trans. Circuits Syst. Video Technol.*, 34(8): 7523–7536, 2024. 1
- [2] Gwangbin Bae and Andrew J. Davison. Rethinking inductive biases for surface normal estimation. In *Proc. CVPR*, pages 9535–9545, 2024. 1
- [3] Yuxin Cheng, Zhiqiang Huang, Siwen Quan, Xinyue Cao, Shikun Zhang, and Jiaqi Yang. Sampling locally, hypothesis globally: accurate 3d point cloud registration with a ransac variant. *Visual Intelligence*, 20:1–15, 2023. 2
- [4] Andreas Geiger, Philip Lenz, and Raquel Urtasun. Are we ready for autonomous driving? the KITTI vision benchmark suite. In *Proc. CVPR*, pages 3354–3361, 2012. 1
- [5] Kaiming He, Xiangyu Zhang, Shaoqing Ren, and Jian Sun. Deep residual learning for image recognition. In *Proc. CVPR*, pages 770–778, 2016. 1
- [6] Shuhao Kang, Youqi Liao, Jianping Li, and et al. Cofii2p: Coarse-to-fine correspondences-based image to point cloud registration. *IEEE Robotics Autom. Lett.*, 9(11):10264–10271, 2024. 1
- [7] Jiaxin Li and Gim Hee Lee. DeepI2P: Image-to-point cloud registration via deep classification. In *Proc. CVPR*, pages 15960–15969, 2021. 1
- [8] Minhao Li, Zheng Qin, Zhirui Gao, Renjiao Yi, Chenyang Zhu, Yulan Guo, and Kai Xu. 2D3D-MATR: 2D-3D match-

ing transformer for detection-free registration between images and point clouds. In *Proc. ICCV*, pages 1–10, 2023. [1](#)

- [9] David G. Lowe. Distinctive image features from scale-invariant keypoints. *Int. J. Comput. Vis.*, 60(2):91–110, 2004. [1](#)
- [10] Siyu Ren, Yiming Zeng, Junhui Hou, and Xiaodong Chen. CorrI2P: Deep image-to-point cloud registration via dense correspondence. *IEEE Trans. Circuits Syst. Video Technol.*, 33(3):1198–1208, 2023. [1](#)
- [11] Edward Rosten and Tom Drummond. Machine learning for high-speed corner detection. In *Proc. ECCV*, pages 430–443, 2006. [1](#)
- [12] Paul-Edouard Sarlin, Daniel DeTone, Tomasz Malisiewicz, and Andrew Rabinovich. Superglue: Learning feature matching with graph neural networks. In *Proc. CVPR*, pages 4937–4946, 2020. [1](#)
- [13] Hugues Thomas, Charles R. Qi, Jean-Emmanuel Deschaud, Beatriz Marcotequi, François Goulette, and Leonidas J. Guibas. Kpconv: Flexible and deformable convolution for point clouds. In *Proc. ICCV*, pages 6410–6419, 2019. [1](#)
- [14] Gongxin Yao, Yixin Xuan, Xinyang Li, and Yu Pan. Cmr-agent: Learning a cross-modal agent for iterative image-to-point cloud registration. In *Proc. IROS*, pages 13458–13465, 2024. [1](#)
- [15] Hengshuang Zhao, Li Jiang, Jiaya Jia, Philip H. S. Torr, and Vladlen Koltun. Point transformer. In *Proc. ICCV*, pages 16239–16248, 2021. [1](#)
- [16] Junsheng Zhou, Baorui Ma, Wenyuan Zhang, Yi Fang, Yu-Shen Liu, and Zhizhong Han. Differentiable registration of images and lidar point clouds with voxelpoint-to-pixel matching. In *Proc. NeurIPS*, pages 1–10, 2023. [1](#)
